# Supplementary material
Source: PubMed Central journal article supplement (PMC5053870)
Supplement: NIHMS804607-supplement-1.pdf [file NIHMS804607-supplement-1.pdf]

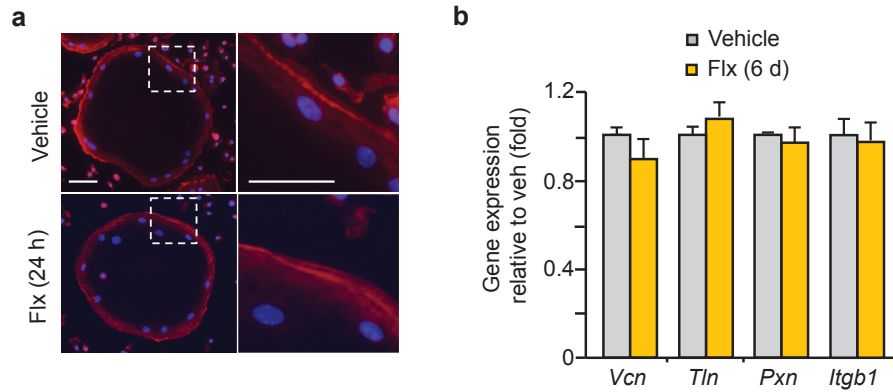

Supplementary Figure 1. Flx does not affect actin ring formation in primary osteoclast cultures (OCs). OCs treated for 6 days with vehicle or Flx. **(a)** Staining of actin-ring with phalloidin-rodamine (red) and nuclei with DAPI (blue). Left panels show magnification of the boxed areas ( $n = 10$  images per condition). Scale bar:  $100 \mu\text{m}$ . **(b)** Gene expression of markers of osteoclast actin ring formation ( $n = 6$ ). *Vcn*, Vinculin. *Tln*, Talin. *Pxn*, Paxillin. *Itgb1*, Integrin  $\beta 1$ .

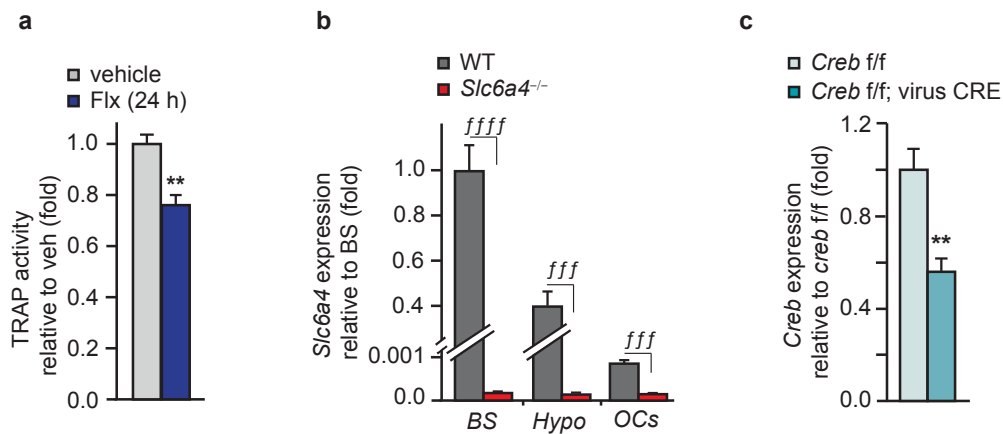

Supplementary Figure 2. Flx affects osteoclastogenesis in a 5HTT- independent manner. **(a)** TRAP activity in primary osteoclast cultures derived from *Tph1*<sup>-/-</sup> mice ( $n = 4$ ). **(b)** *Slc6a4* expression in brain and primary osteoclast cultures (OCs) of *Slc6a4*<sup>-/-</sup> samples compared to wt (BS wt  $n = 7$ , *Slc6a4*<sup>-/-</sup>  $n = 11$ ; Hypo  $n = 9$ ; OCs:  $n = 9$ ). BS, brainstem. Hypo, hypothalamus. OCs, primary osteoclasts. *Slc6a4*, gene encoding 5HTT. **(c)** CRE recombination of primary osteoclast cultures derived from *Creb*<sup>fl/fl</sup> mice measured as *Creb* expression. (empty  $n = 8$ , CRE  $n = 6$ ). Values are mean  $\pm$  SEM. To veh (\*) or wt (<sup>f</sup>) \* $P \leq 0.05$ , \*\* $P \leq 0.01$ , \*\*\*/<sup>fff</sup> $P \leq 0.001$  using Student's test.

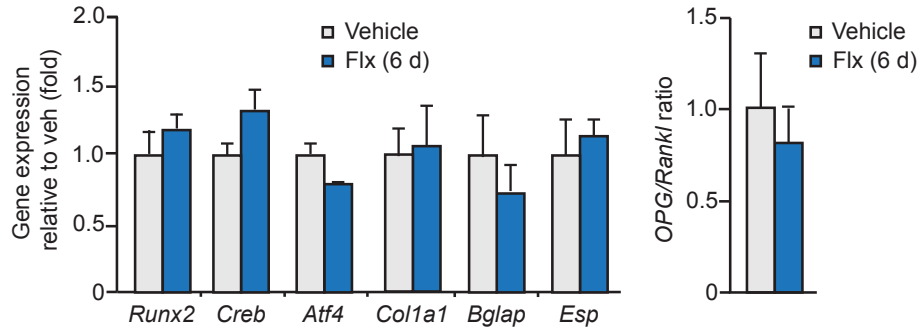

Supplementary Figure 3. Flx does not affect differentiation or function of primary osteoblast cultures. Gene expression ( $n = 9$ ). *Col1a1*, *Type 1 Collagen alpha 1*. *Ocn*, *Osteocalcin*. The *OPG/Rankl* ratio, an indicator of osteoblast-driven osteoclast differentiation, is shown on the right. Values are mean  $\pm$  SEM.

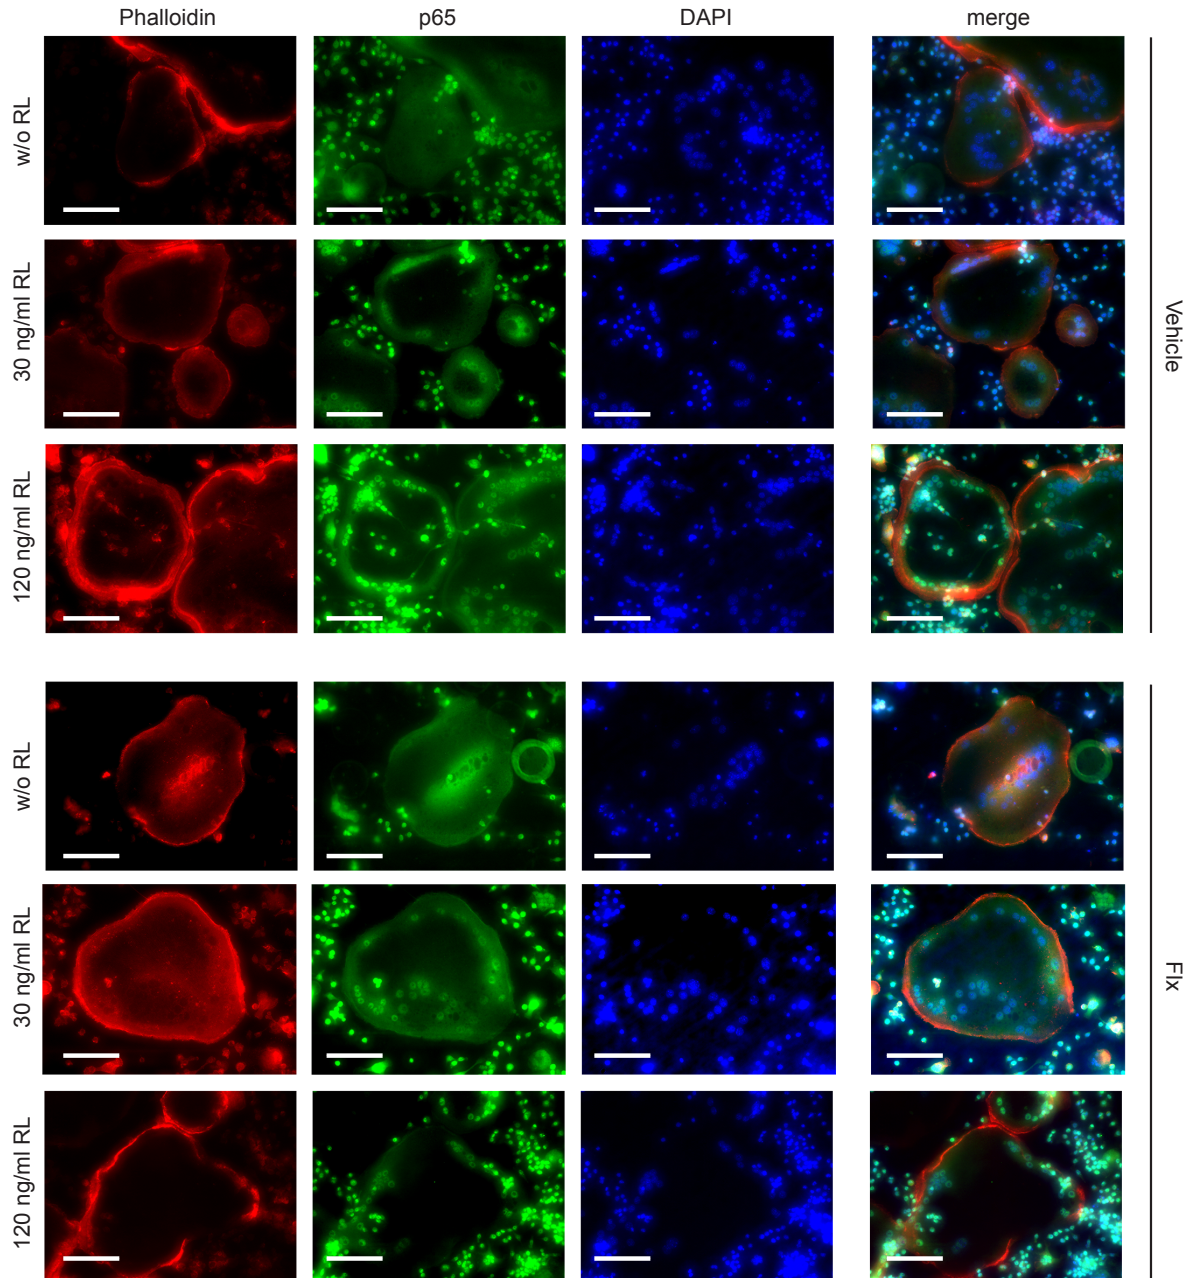

Supplementary Figure 4. Brain serotonin-dependent increase in RANKL can rescue the impairment in osteoclastogenesis caused by Flx. NF $\kappa$ B p65 subcellular localization analysis by immunocytochemistry in osteoclast-like RAW264.7 cultures. Staining with AF-548 phalloidine (red), NF $\kappa$ B p65 (green) and nuclei with DAPI (blue) ( $n = 10$  images per condition). RL, RANKL. Scale bar: 100  $\mu$ m.

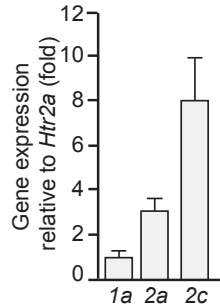

Supplementary Figure 5. Gene expression of *Htr21a*, *2a* and *2c* hypothalamic serotonin receptors in neuron-like Neuro2A cell line ( $n = 5$ ). Values are mean  $\pm$  SEM.

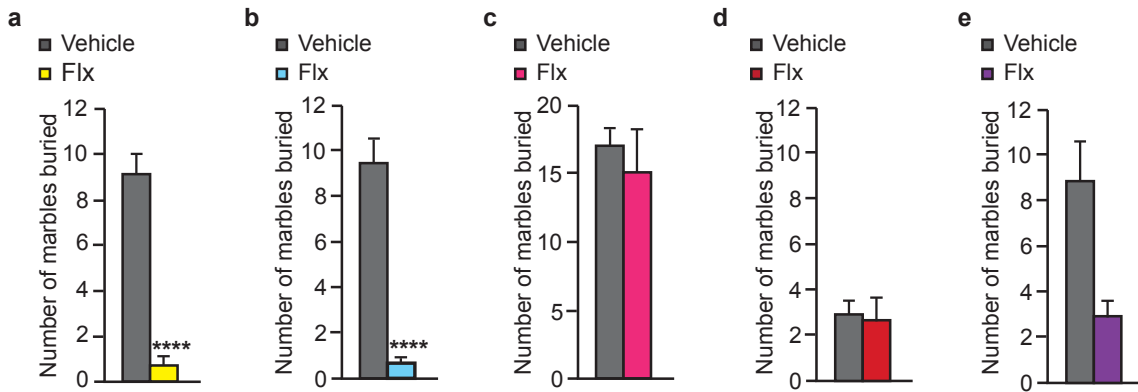

Supplementary Figure 6. Marble burying behavioral test. **(a, b)** WT females treated for 3 weeks **(a)** or 6 weeks **(b)** ( $n = 13$ ). **(c)** *Tph2*<sup>-/-</sup> females treated for 6 weeks ( $n = 5$ ). **(d)** *Slc6a4*<sup>-/-</sup> females treated for 3 weeks ( $n = 7$ ). **(e)** WT males treated for 6 weeks ( $n = 10$ ). Values are mean  $\pm$  SEM. To veh \*\*\*\* $P \leq 0.0001$  using Student's test.
